# Supplementary material for: Potential Biomarkers for Post-Stroke Cognitive Impairment: A Systematic Review and Meta-Analysis
Source: MDPI journal article supplement (doi:10.3390/ijms23020602), 2022-01-06
Supplement: s1 [file s1]

Supplementary Table S1. Summary of the included studies for meta-analysis

| Biomarker | Study             | group characteristics |              |                |              | Std diff in means | 95% CI        | p     | Model         |
|-----------|-------------------|-----------------------|--------------|----------------|--------------|-------------------|---------------|-------|---------------|
|           |                   | PSCI group            |              | Non-PSCI group |              |                   |               |       |               |
|           |                   | n                     | M±SD or mean | n              | M±SD or mean |                   |               |       |               |
| Hcy       | Hou et al., 2019  | 141                   | 15.4±5.3     | 120            | 14.1±4.9     | 0.254             | 0.010~0.498   | 0.042 | Random effect |
|           | Mao et al., 2020  | 72                    | 15.8±8.2     | 116            | 15±8.6       | 0.095             | -0.200~0.389  | 0.528 |               |
|           | Sun et al., 2020  | 188                   | 13.16±7.66   | 86             | 11.14±4.3    | 0.297             | 0.041~0.554   | 0.023 |               |
|           | Wang et al., 2021 | 1029                  | 15.18        | 6650           | 14.64        | 0.110             | 0.045~0.176   | 0.001 |               |
|           | Yan et al., 2015  | 91                    | 21±4.21      | 13             | 13±5.03      | 1.854             | 1.221~2.488   | 0.000 |               |
|           | Zhu et al., 2020  | 86                    | 15.5±4.9     | 170            | 14.3±5.4     | 0.229             | -0.031~0.489  | 0.084 |               |
| CRP       | Choi et al., 2020 | 8                     | 19.8         | 35             | 3.5          | 1.237             | 0.425~2.048   | 0.003 | Random effect |
|           | Hou et al., 2019  | 141                   | 5.3          | 120            | 5.5          | 0.053             | -0.190~0.297  | 0.668 |               |
|           | Mao et al., 2020  | 72                    | 4.8±4.6      | 116            | 6.2±7.1      | 0.223             | -0.071~0.518  | 0.137 |               |
|           | Ran et al., 2020  | 82                    | 10.7±5.3     | 115            | 6.2±2.7      | 1.127             | 0.823~1.432   | 0.000 |               |
|           | Wang et al., 2021 | 1029                  | 3.51         | 665            | 3.61         | 0.048             | -0.049~0.146  | 0.332 |               |
|           | Weng et al., 2020 | 176                   | 2.89         | 197            | 2.2          | 0.287             | 0.082~0.491   | 0.006 |               |
|           | Yan et al., 2015  | 91                    | 6.35±1.96    | 13             | 6.07±2.35    | 0.139             | -0.442~0.721  | 0.639 |               |
|           | Zhu et al., 2020  | 86                    | 6.8          | 170            | 3.4          | 0.367             | 0.105~0.628   | 0.006 |               |
| Uric acid | Ran et al., 2020  | 82                    | 291.8±98.3   | 115            | 326.4±103.7  | -0.341            | -0.626~-0.056 | 0.019 | Random effect |
|           | Sun et al., 2020  | 188                   | 342.83±89.14 | 86             | 311.8±69.29  | 0.372             | 0.115~0.629   | 0.005 |               |
|           | Weng et al., 2020 | 176                   | 302.5        | 197            | 311          | -0.091            | -0.294~0.113  | 0.383 |               |
|           | Zeng et al., 2019 | 71                    | 341.14±61.9  | 81             | 328.8±77.06  | 0.175             | -0.144~0.495  | 0.282 |               |
| HbA1c     | Wang et al., 2021 | 1029                  |              | 665            |              | 0.006             | -0.091~0.104  | 0.901 | Fixed         |

|       |                   |     |           |     |           |        |              |       |               |
|-------|-------------------|-----|-----------|-----|-----------|--------|--------------|-------|---------------|
|       | Weng et al., 2020 | 176 | 6.3       | 197 | 6.1       | 0.181  | -0.023~0.385 | 0.082 |               |
|       | Zeng et al., 2019 | 71  | 7.1±1.19  | 81  | 7.09±1.9  | 0.006  | -0.312~0.325 | 0.969 |               |
| TC    | Hou et al., 2019  | 141 | 4.1±1.1   | 120 | 3.9±1     | 0.190  | -0.054~0.434 | 0.128 | Fixed         |
|       | Mao et al., 2020  | 72  | 4.54±0.78 | 116 | 4.58±0.72 | 0.054  | -0.240~0.348 | 0.720 |               |
|       | Ran et al., 2020  | 82  | 5.32±1.02 | 115 | 5.25±0.96 | 0.071  | -0.212~0.354 | 0.623 |               |
|       | Sun et al., 2020  | 188 | 4.37±1.06 | 86  | 4.47±1.06 | 0.094  | -0.161~0.350 | 0.469 |               |
|       | Zeng et al., 2019 | 71  | 5.39±0.97 | 81  | 4.83±1.32 | 0.479  | 0.156~0.802  | 0.004 |               |
|       | Zhu et al., 2020  | 86  | 4±1.1     | 170 | 4±1       | 0.000  | -0.259~0.259 | 1.000 |               |
| TG    | Hou et al., 2019  | 141 |           | 120 |           | 0.081  | -0.163~0.324 | 0.515 | Fixed         |
|       | Mao et al., 2020  | 72  | 1.48±0.57 | 116 | 1.31±0.41 | 0.356  | 0.060~0.652  | 0.018 |               |
|       | Ran et al., 2020  | 82  | 1.58±1.33 | 115 | 1.68±1.41 | -0.073 | -0.356~0.211 | 0.616 |               |
|       | Sun et al., 2020  | 188 | 1.57±0.97 | 86  | 1.76±0.88 | -0.202 | -0.457~0.054 | 0.122 |               |
|       | Zeng et al., 2019 | 71  | 1.33±0.4  | 81  | 1.37±0.57 | -0.080 | -0.399~0.238 | 0.621 |               |
|       | Zhu et al., 2020  | 86  | 1.4       | 170 | 1.3       | 0.044  | -0.216~0.303 | 0.741 |               |
| HDL-C | Hou et al., 2019  | 141 | 1.1±0.2   | 120 | 1.1±0.2   | 0.000  | -0.243~0.243 | 1.000 | Random effect |
|       | Mao et al., 2020  | 72  | 1.19±0.17 | 116 | 1.12±0.22 | 0.346  | 0.050~0.642  | 0.022 |               |
|       | Sun et al., 2020  | 188 | 1.08±0.3  | 86  | 1.08±0.35 | 0.000  | -0.255~0.255 | 1.000 |               |
|       | Zeng et al., 2019 | 71  | 1±0.33    | 81  | 1.05±0.28 | 0.134  | -0.155~0.483 | 0.313 |               |
|       | Zhu et al., 2020  | 86  | 1±0.2     | 170 | 1.1±0.2   | 0.500  | 0.237~0.763  | 0.000 |               |
| LDL-C | Hou et al., 2019  | 141 |           | 120 |           | 0.035  | -0.209~0.278 | 0.780 | Random effect |
|       | Mao et al., 2020  | 72  | 2.85±0.71 | 116 | 2.34±0.76 | 0.688  | 0.386~0.990  | 0.000 |               |
|       | Sun et al., 2020  | 188 | 1.34±0.84 | 86  | 1.35±0.88 | 0.012  | -0.243~0.267 | 0.928 |               |
|       | Yan et al., 2015  | 91  | 4.27±2.78 | 13  | 3.81±2.36 | 0.168  | -0.413~0.750 | 0.571 |               |

|  |                   |    |           |     |          |       |              |       |  |
|--|-------------------|----|-----------|-----|----------|-------|--------------|-------|--|
|  | Zeng et al., 2019 | 71 | 3.45±0.77 | 81  | 3.2±0.87 | 0.303 | -0.017~0.624 | 0.064 |  |
|  | Zhu et al., 2020  | 86 | 2.4       | 170 | 2.3      | 0.125 | -0.134~0.385 | 0.344 |  |

Hcy: homocysteine, CRP: C-reactive protein, HbA1c: glycated hemoglobin, TC: total cholesterol, TG: triglyceride, HDL-C: high-density lipoprotein cholesterol, LDL-C: low-density lipoprotein cholesterol, Std diff: standard difference, CI: confidence interval, PSCI: post-stroke cognitive impairment
